# Supplementary material for: Differentiation of Pathogenic Th17 Cells Is Negatively Regulated by Let-7 MicroRNAs in a Mouse Model of Multiple Sclerosis
Source: Front Immunol. 2020 Jan 17;10:3125. doi: 10.3389/fimmu.2019.03125 (PMC6978752; doi:10.3389/fimmu.2019.03125)
Supplement: Table S2 — List of let-7-binding sites identified in mouse and human Ccr2 and Ccr5 mRNA sequences. [file Table_2.XLSX]

## Sheet: Feuil1
Supplementary Tabe S2: List of let-7-binding sites identified in mouse and human Ccr2 and Ccr5 mRNA sequences
Species	Receptor	Accession number	Binding site	Sequence	Positon
Mouse	Ccr2	NM_009915.2	1	TACCTCA	153-159
			2	ACCTCA	2025-2030
	Ccr5	NM_009917.5	1	CTACCT	311-316
			2	ACTACC	356-361
Human	CCR2	NM_001123396.2	1	ACCTCA	211-216
			2	CTACCTC	360-366
			3	ACCTCA	1679-1684
	CCR5	NM_000579.3	1	CTACCT	558-563
			2	ACTACCTC	1274-1281
